# Supplementary material
Source: MDPI journal article supplement (https://www.mdpi.com/2311-5637/9/4/377)
Supplement: s1 [file s1]

# Changes in Physicochemical Properties, Metabolites and Antioxidant Activity of Edible Grass During Spontaneous Fermentation

Xianxiu Li <sup>1,2,\*</sup>, Tao He <sup>1,2,†</sup>, Yangchen Mao <sup>3</sup>, Jianwei Mao <sup>1,2</sup>, Xiaojin Lai <sup>1,2</sup>, Hangjia Tu <sup>1,2</sup>, Yi Zhou <sup>1,2</sup> and Ruyi Sha <sup>1,2,\*</sup>

<sup>1</sup> School of Biological and Chemical Engineering, Zhejiang University of Science and Technology, Hangzhou 310023, China; zjhzmjw@163.com (J.M.)

<sup>2</sup> Zhejiang Provincial Key Laboratory for Chemical & Biological Processing Technology of Farm Product, Hangzhou 310023, China

<sup>3</sup> School of Medicine, University of Southampton, Southampton SO17 1BJ, UK; m13735877964@163.com

\* Correspondence: lixianxiu@zust.edu.cn (X.L.); rysha@zust.edu.cn (R.S.)

† These authors contributed equally to this work.

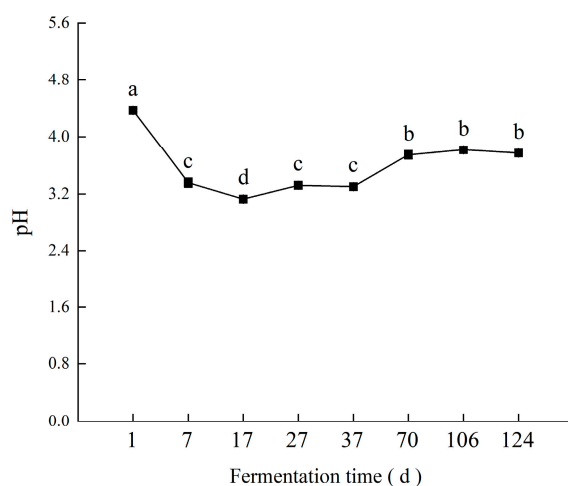

Supplemental Figure S1. Changes in pH during edible grass fermentation. Different superscript letters indicate significant differences ( $p < 0.05$ ).

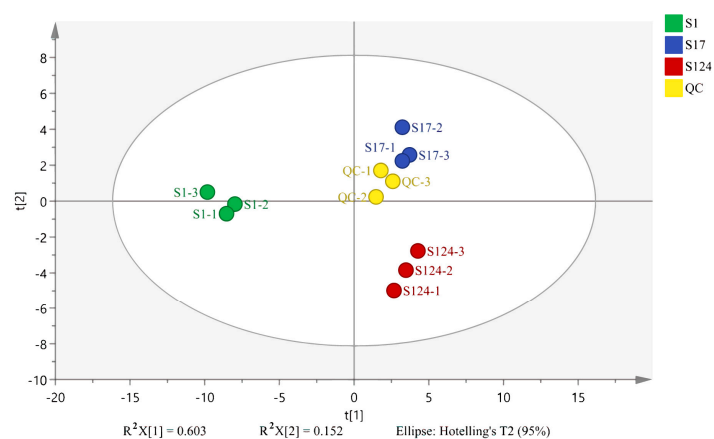

Supplemental Figure S2. PCA score plot based on the GC-MS data of fermented edible grass samples from different fermentation times. S1, S17 and S124 represent the samples on the first day of fermentation, the 17th day of fermentation and the 124th day of fermentation, respectively. QC represents the quality control sample. Each dot represents the replicate of samples in the plot.

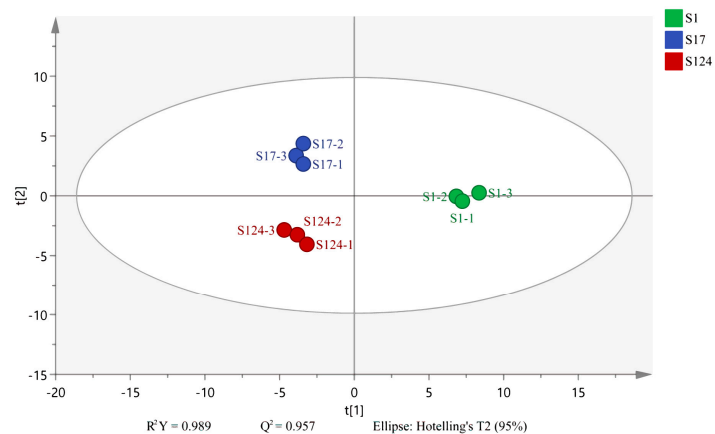

Supplemental Figure S3. PLS-DA score plot based on the GC-MS data of fermented edible grass samples from different fermentation times. S1, S17 and S124 represent the samples on the first day of fermentation, the 17th day of fermentation and the 124th day of fermentation, respectively. Each dot represents the replicate of samples in the plot.

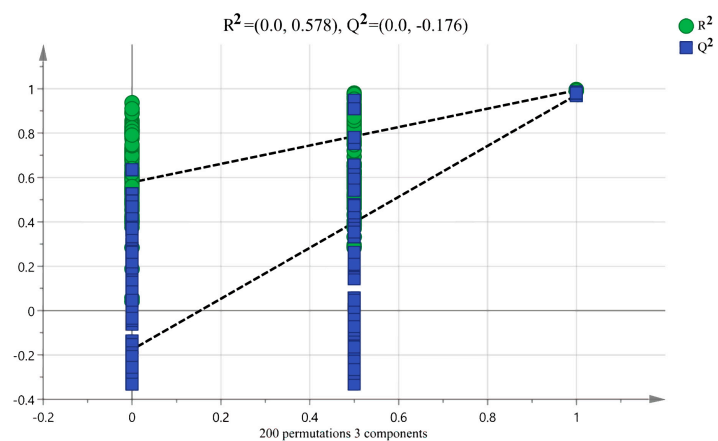

Supplemental Figure S4. Response permutation testing based on the GC-MS data of fermented edible grass samples from different fermentation times.

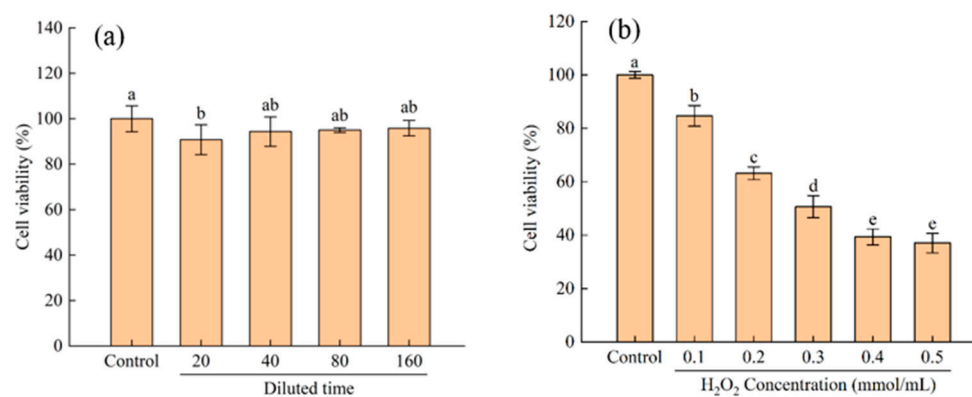

Supplemental Figure S5. The viabilities of HepG2 cells treated with (a) fermented edible grass and (b)  $H_2O_2$  at different concentrations. Different superscript letters in the columns indicate significant differences ( $p < 0.05$ ).

Supplemental Table S1. Identification of metabolites by GC-MS during fermentation.

| No. | Class        | Metabolite identity             | Retention time | Molecular formula                               |
|-----|--------------|---------------------------------|----------------|-------------------------------------------------|
| 1   | Sugar        | D-Arabinose                     | 17.728         | C <sub>5</sub> H <sub>10</sub> O <sub>5</sub>   |
| 2   | Sugar        | D-Ribofuranose                  | 18.66          | C <sub>5</sub> H <sub>10</sub> O <sub>5</sub>   |
| 3   | Sugar        | β-Arabinopyranose               | 19.171         | C <sub>5</sub> H <sub>10</sub> O <sub>5</sub>   |
| 4   | Sugar        | D-Ribose                        | 19.373         | C <sub>5</sub> H <sub>10</sub> O <sub>5</sub>   |
| 5   | Sugar        | D-Lyxose                        | 19.582         | C <sub>5</sub> H <sub>10</sub> O <sub>5</sub>   |
| 6   | Sugar        | D-Xylose                        | 19.817         | C <sub>5</sub> H <sub>10</sub> O <sub>5</sub>   |
| 7   | Sugar        | D-Ribofuranose                  | 21.159         | C <sub>5</sub> H <sub>10</sub> O <sub>5</sub>   |
| 8   | Sugar        | D-Lyxofuranose                  | 21.168         | C <sub>5</sub> H <sub>10</sub> O <sub>5</sub>   |
| 9   | Sugar        | D-Psicofuranose                 | 21.586         | C <sub>6</sub> H <sub>12</sub> O <sub>6</sub>   |
| 10  | Sugar        | D-Fructose(anti)                | 22.678         | C <sub>6</sub> H <sub>12</sub> O <sub>6</sub>   |
| 11  | Sugar        | D-Fructose(syn)                 | 22.837         | C <sub>6</sub> H <sub>12</sub> O <sub>6</sub>   |
| 12  | Sugar        | D-Mannose                       | 22.946         | C <sub>6</sub> H <sub>12</sub> O <sub>6</sub>   |
| 13  | Sugar        | D-Galactose                     | 22.997         | C <sub>6</sub> H <sub>12</sub> O <sub>6</sub>   |
| 14  | Sugar        | D-Glucose                       | 27.878         | C <sub>6</sub> H <sub>12</sub> O <sub>6</sub>   |
| 15  | Sugar        | Sucrose                         | 30.848         | C <sub>12</sub> H <sub>22</sub> O <sub>11</sub> |
| 16  | Sugar        | Palatinose                      | 32.174         | C <sub>12</sub> H <sub>22</sub> O <sub>11</sub> |
| 17  | Sugar        | D-Trehalose                     | 32.256         | C <sub>12</sub> H <sub>22</sub> O <sub>11</sub> |
| 18  | Sugar        | 2-α-Mannobiose                  | 32.274         | C <sub>12</sub> H <sub>22</sub> O <sub>11</sub> |
| 19  | Sugar        | β-Gentiobiose                   | 32.543         | C <sub>12</sub> H <sub>22</sub> O <sub>11</sub> |
| 20  | Sugar        | Maltose                         | 32.987         | C <sub>12</sub> H <sub>22</sub> O <sub>11</sub> |
| 21  | Organic acid | Lactic Acid                     | 9.734          | C <sub>3</sub> H <sub>6</sub> O <sub>3</sub>    |
| 22  | Organic acid | Glycolic acid                   | 9.935          | C <sub>2</sub> H <sub>4</sub> O <sub>3</sub>    |
| 23  | Organic acid | Oxalic acid                     | 10.867         | C <sub>2</sub> H <sub>2</sub> O <sub>6</sub>    |
| 24  | Organic acid | 1,2,4-Benzenetricarboxylic acid | 11.84          | C <sub>11</sub> H <sub>10</sub> O <sub>6</sub>  |
| 25  | Organic acid | Butanedioic acid                | 13.895         | C <sub>4</sub> H <sub>6</sub> O <sub>4</sub>    |
| 26  | Organic acid | Gluconic acid                   | 15.531         | C <sub>6</sub> H <sub>12</sub> O <sub>7</sub>   |

|    |              |                                                      |        |                                                                 |
|----|--------------|------------------------------------------------------|--------|-----------------------------------------------------------------|
| 27 | Organic acid | D-Citramalic acid                                    | 16.596 | C <sub>5</sub> H <sub>8</sub> O <sub>5</sub>                    |
| 28 | Organic acid | Malic acid                                           | 16.839 | C <sub>4</sub> H <sub>6</sub> O <sub>5</sub>                    |
| 29 | Organic acid | Pentanedioic acid                                    | 18.123 | C <sub>5</sub> H <sub>8</sub> O <sub>4</sub>                    |
| 30 | Organic acid | Arabinonic acid                                      | 19.029 | C <sub>5</sub> H <sub>10</sub> O <sub>6</sub>                   |
| 31 | Organic acid | Octanoic acid                                        | 20.866 | C <sub>8</sub> H <sub>16</sub> O <sub>2</sub>                   |
| 32 | Organic acid | Acetic acid                                          | 26.855 | C <sub>2</sub> H <sub>4</sub> O <sub>2</sub>                    |
| 33 | Fatty acid   | Glyceric acid                                        | 14.289 | C <sub>3</sub> H <sub>6</sub> O <sub>4</sub>                    |
| 34 | Fatty acid   | Palmitic Acid                                        | 24.163 | C <sub>16</sub> H <sub>32</sub> O <sub>2</sub>                  |
| 35 | Fatty acid   | Stearic acid                                         | 26.344 | C <sub>18</sub> H <sub>36</sub> O <sub>2</sub>                  |
| 36 | Amino acid   | β-Alanine                                            | 16.302 | C <sub>3</sub> H <sub>7</sub> NO <sub>2</sub>                   |
| 37 | Amino acid   | 4-Aminobutanoic acid                                 | 17.401 | C <sub>4</sub> H <sub>9</sub> NO <sub>2</sub>                   |
| 38 | Polyol       | Propylene glycol                                     | 9.172  | C <sub>3</sub> H <sub>8</sub> O <sub>2</sub>                    |
| 39 | Polyol       | Glycerol                                             | 13.366 | C <sub>3</sub> H <sub>8</sub> O <sub>3</sub>                    |
| 40 | Polyol       | 1,2,3-Butanetriol                                    | 13.641 | C <sub>4</sub> H <sub>10</sub> O <sub>3</sub>                   |
| 41 | Polyol       | Erythritol                                           | 17.25  | C <sub>4</sub> H <sub>10</sub> O <sub>4</sub>                   |
| 42 | Polyol       | Xylitol                                              | 20.396 | C <sub>5</sub> H <sub>12</sub> O <sub>5</sub>                   |
| 43 | Polyol       | D-Sorbitol                                           | 23.341 | C <sub>6</sub> H <sub>14</sub> O <sub>6</sub>                   |
| 44 | Polyol       | Myo-Inositol                                         | 25.018 | C <sub>6</sub> H <sub>12</sub> O <sub>6</sub>                   |
| 45 | Other        | 2,4-Di-tert-butylphenol                              | 17.091 | C <sub>14</sub> H <sub>22</sub> O                               |
| 46 | Other        | Glyceryl-glycoside                                   | 27.342 | C <sub>9</sub> H <sub>18</sub> O <sub>8</sub>                   |
| 47 | Other        | 4-Methylthio-N-phenyl-1,2-carb<br>azoledicarboximide | 28.768 | C <sub>21</sub> H <sub>14</sub> N <sub>2</sub> O <sub>2</sub> S |
| 48 | Other        | 1-Monopalmitin                                       | 29.917 | C <sub>19</sub> H <sub>38</sub> O <sub>4</sub>                  |
